# Supplementary material for: One-dimensional Ag3PO4/TiO2 heterostructure with enhanced photocatalytic activity for the degradation of 4-nitrophenol
Source: Royal Society of Chemistry journal article supplement (doi:10.1039/c4ra15946b), 2015-01-01
Supplement: c4ra15946b1.pdf [file c4ra15946b1.pdf]

## Electronic Supplementary Information

# One-dimensional $\text{Ag}_3\text{PO}_4/\text{TiO}_2$ heterostructure with enhanced photocatalytic activity for the degradation of 4-nitrophenol

Mingyi Zhang, Lu Li and Xitian Zhang\*

*Key Laboratory for Photonic and Electronic Bandgap Materials, Ministry of Education, School of Physics and Electronic Engineering, Harbin Normal University, Harbin 150025, People's Republic of China.*

\*Corresponding author:

E-mail: [xtzhangzhang@hotmail.com](mailto:xtzhangzhang@hotmail.com) (X.T. Zhang)

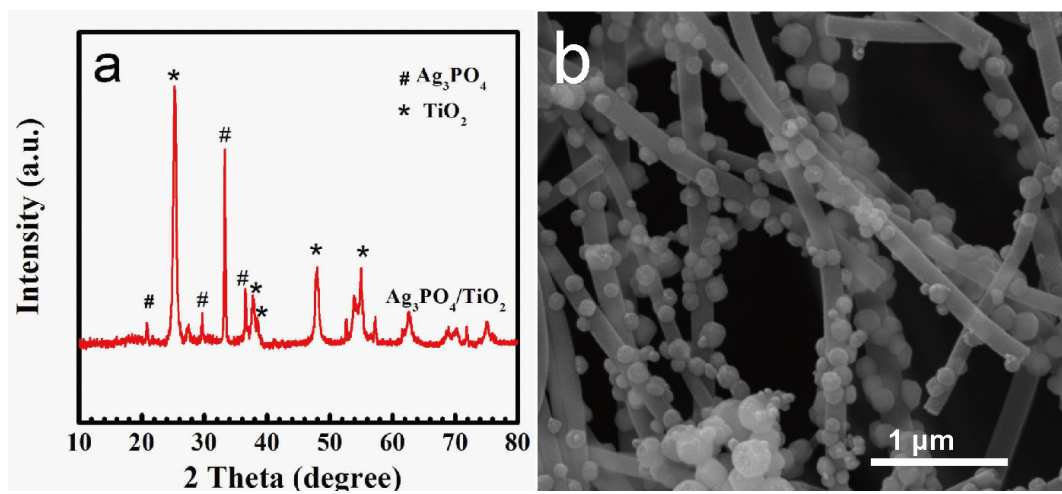

Fig. S1 (a) XRD patterns and (b) SEM images of  $\text{Ag}_3\text{PO}_4/\text{TiO}_2$  heterostructure after three times photocatalytic reaction.

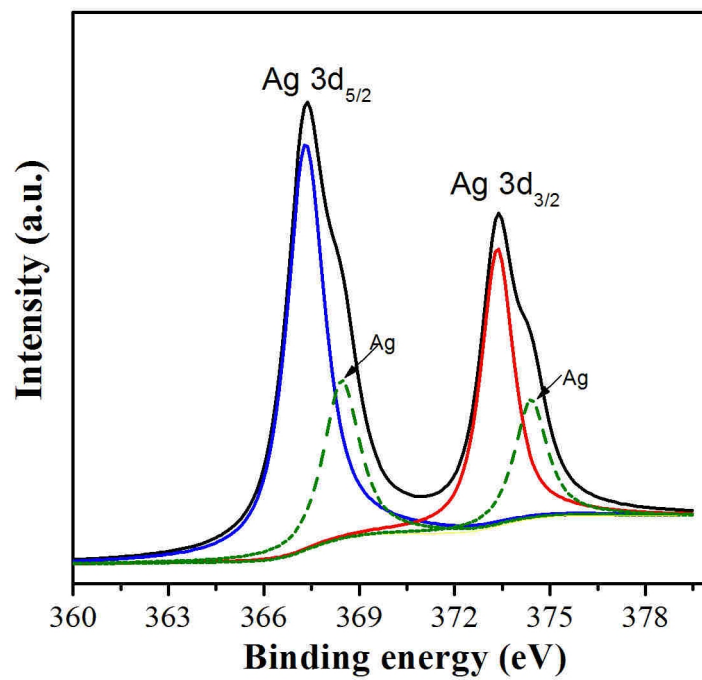

Fig. S2. XPS spectrum of Ag 3d of Ag<sub>3</sub>PO<sub>4</sub>/TiO<sub>2</sub> heterostructure.

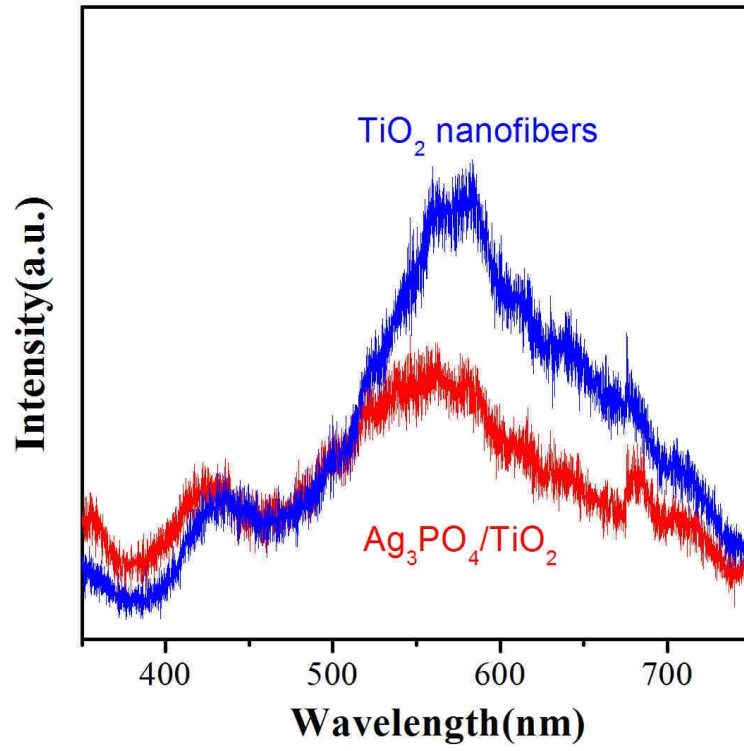

Fig. S3 PL emission spectra of TiO<sub>2</sub> and Ag<sub>3</sub>PO<sub>4</sub>/TiO<sub>2</sub> nanofibers.
